# Supplementary material for: Characteristics of wear particles and wear behavior of retrieved PEEK-on-HXLPE total knee implants: a preliminary study
Source: Royal Society of Chemistry journal article supplement (doi:10.1039/c8ra04661a), 2018-01-01
Supplement: c8ra04661a1.pdf [file c8ra04661a1.pdf]

A The chemical structure of PEEK

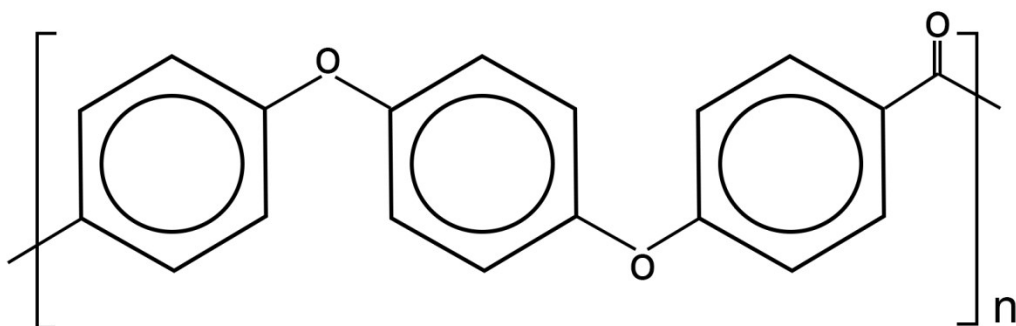

B The characteristics of the PEEK (Zeniva ZA-500)

| Physical Properties | Metric                                           | English                                          | Comments  |
|---------------------|--------------------------------------------------|--------------------------------------------------|-----------|
| Density             | <a href="#">1.30 g/cc</a>                        | <a href="#">0.0470 lb/in<sup>3</sup></a>         | ASTM D792 |
| Viscosity           | <a href="#">440000 cP</a><br>@Temperature 400 °C | <a href="#">440000 cP</a><br>@Temperature 752 °F | 1000/s    |

  

| Mechanical Properties   | Metric                       | English                         | Comments  |
|-------------------------|------------------------------|---------------------------------|-----------|
| Tensile Strength, Yield | <a href="#">≥ 90.0 MPa</a>   | <a href="#">≥ 13100 psi</a>     | ASTM D638 |
| Tensile Modulus         | <a href="#">3.40 GPa</a>     | <a href="#">493 ksi</a>         | ASTM D638 |
| Izod Impact, Notched    | <a href="#">≥ 0.800 J/cm</a> | <a href="#">≥ 1.50 ft-lb/in</a> | ASTM D256 |

Figure S1. The chemical structure and characteristics of PEEK.

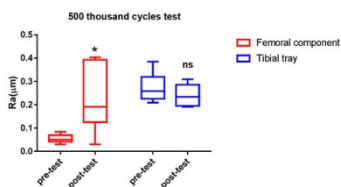

Figure S2. Results of 500000 cycles test in vitro tribological changes: the surface of the PEEK component tended to be rougher, while that of HXLPE tended to be smoother.

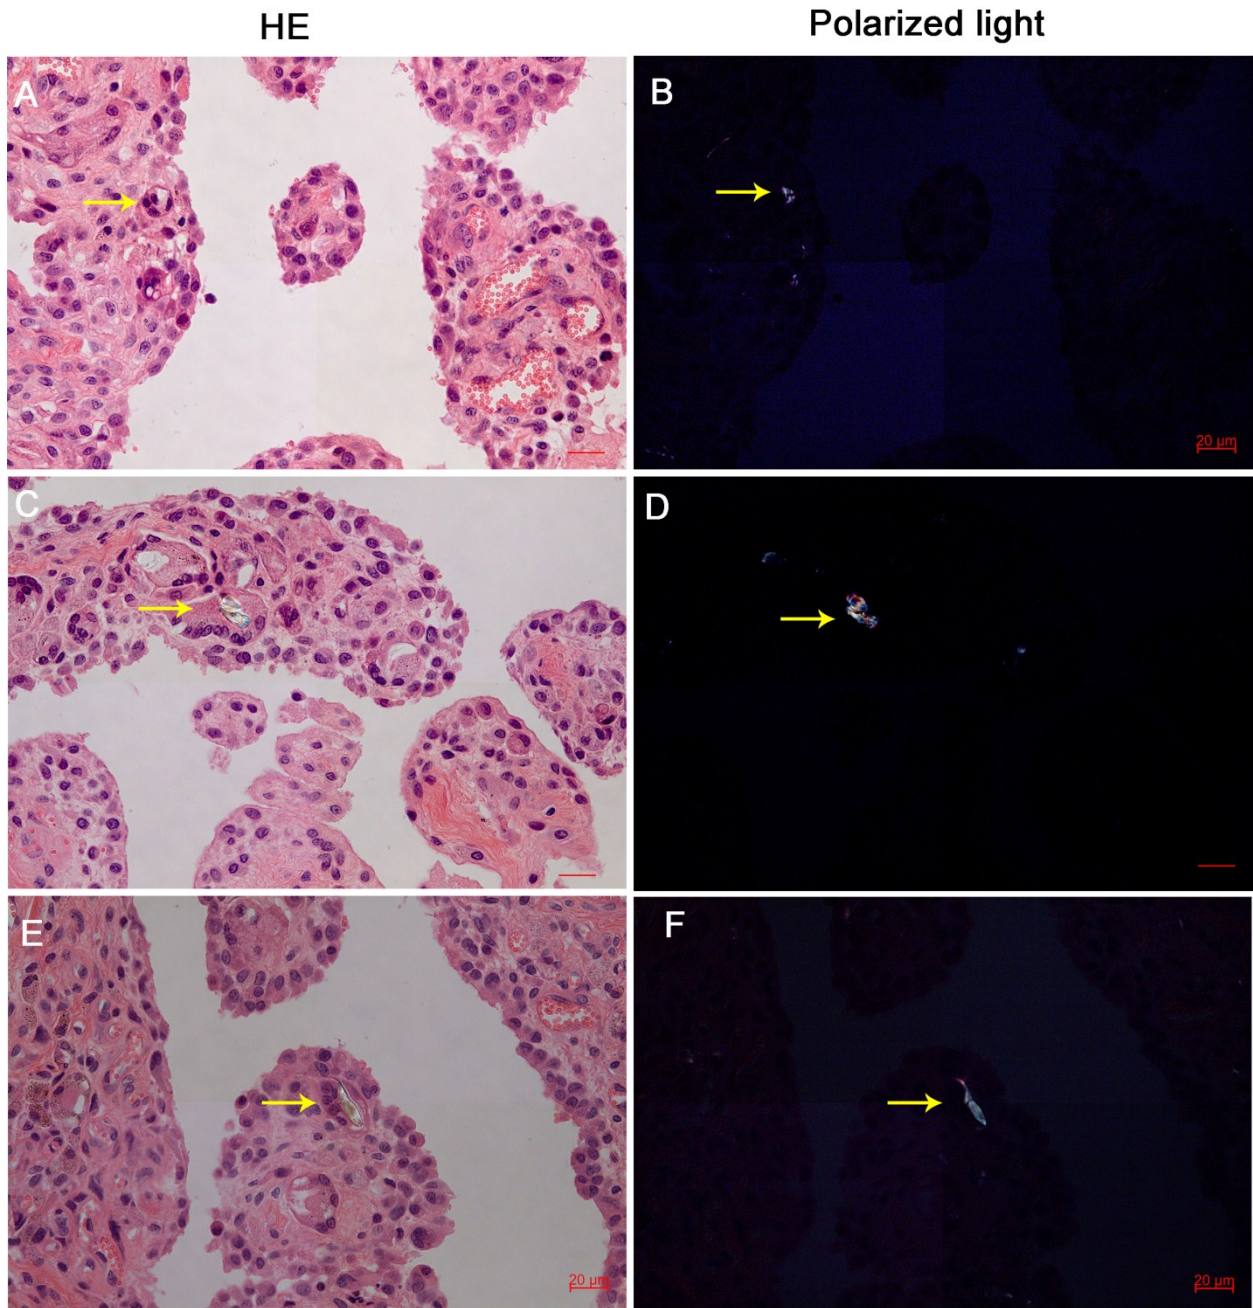

Figure S3. The wear particles were engulfed and surrounded by macrophagocytes; the yellow arrows indicate particles. Scale bars = 20  $\mu\text{m}$ .
